# Supplementary material for: Familial risk of vasospastic angina: a nationwide family study in Sweden
Source: PubMed Central journal article supplement (PMC10711886; doi:10.1136/openhrt-2023-002504), 2023-12-06
Supplement: openhrt-2023-002504supp001.pdf [file openhrt-2023-002504supp001.pdf]

**Supplementary Tables S1-S8****Table S1. Exclusion codes used in Table S4 for myocardial revascularization**

|                                             | <b>Surgery and medical codes</b>                                                                                                                                                                   |
|---------------------------------------------|----------------------------------------------------------------------------------------------------------------------------------------------------------------------------------------------------|
| CABG                                        | FNA00, FNA10, FNA20, FNA96, FNB00, FNB20, FNB96, FNC10, FNC20, FNC30, FNC40, FNC50, FNC60, FNC96, FND10, FND20, FND96, FNE00, FNE10, FNE20, FNE96                                                  |
| Other coronary interventions, including PCI | FNF00, FNF10, FNF20, FNF30, FNF96, FNG00, FNG02, FNG05, FNG10, FNG20, FNG22, FNG30, FNG96, FNH00, FNH10, FNH20, FNH96, FNJ00, FNJ02, FNJ10, FNJ12, FNJ96, FNK00, FNK10, FNK20, FNK96, FNW96, FNW98 |

**Table S2. Familial risk among of vasospastic angina (VSA) stratified by year of birth.**

| Year of birth | Variable                | Person-years,<br>No. | Cases,<br>No./Persons at<br>risk, No. | Incidence rate,<br>cases/1000<br>person-years | Incidence rate ratio<br>(95%CI) | HR(95% CI)            |                      |                      |
|---------------|-------------------------|----------------------|---------------------------------------|-----------------------------------------------|---------------------------------|-----------------------|----------------------|----------------------|
|               |                         |                      |                                       |                                               |                                 | <b>Model 1</b>        | <b>Model 2</b>       | <b>Model 3</b>       |
| < 1955        | Sibling not<br>affected | 58166669             | 6165/2988167                          | 0.11<br>(0.10-0.11)                           | 1 [Reference]                   | 1 [Reference]         | 1 [Reference]        | 1 [Reference]        |
|               | Sibling<br>affected     | 111761               | 38/5864                               | 0.34<br>(0.25-0.47)                           | 3.21<br>(2.33-4.41)             | 3.20<br>(2.08-4.92)   | 3.05<br>(1.98-4.70)  | 2.36<br>(1.54-3.63)  |
| ≥ 1955        | Sibling not<br>affected | 129742644            | 1636/7148476                          | 0.01<br>(0.01-0.01)                           | 1 [Reference]                   | 1 [Reference]         | 1 [Reference]        | 1 [Reference]        |
|               | Sibling<br>affected     | 40713                | 10/1985                               | 0.24<br>(0.13-0.46)                           | 19.48<br>(10.46-36.27)          | 18.99<br>(8.77-41.16) | 6.31<br>(2.92-13.64) | 4.63<br>(2.12-10.14) |

Abbreviations: HR=hazard ratio, CI=confidence interval.

Model 1 unadjusted. Model 2 adjusted for birth year, sex and educational attainment. Model 3 additionally adjusted for Hypertension, Hyperlipidemia, COPD, Obesity, Diabetes mellitus, Myocardial infarction, Raynaud's phenomenon, Migraine, Cluster headache Horton syndrome, Myocarditis, Malignancy, Oesophageal disease, Alcohol abuse, Cocaine abuse, Tobacco use. All calculations are based on double entry and 95% CI are calculated using robust standard errors.

**Table S3. Familial risk of recurrent episodes ( $\geq 2$ ) of vasospastic angina (VSA) in the national patient register (NPR).**

| Variable             | Person-years, No. | Cases, No./Persons at risk, No. | Incidence rate, cases/1000 person-years | Incidence rate ratio (95%CI) | HR(95% CI)            |                      |                      |
|----------------------|-------------------|---------------------------------|-----------------------------------------|------------------------------|-----------------------|----------------------|----------------------|
|                      |                   |                                 |                                         |                              | <b>Model 1</b>        | <b>Model 2</b>       | <b>Model 3</b>       |
| Sibling not affected | 188000518         | 3119/10141357                   | 0.02<br>(0.02-0.02)                     | 1 [Reference]                | 1 [Reference]         | 1 [Reference]        | 1 [Reference]        |
| Sibling affected     | 61269             | 16/3135                         | 0.26<br>(0.16-0.43)                     | 15.74<br>(9.63-25.73)        | 15.86<br>(8.01-31.40) | 7.54<br>(3.79-14.99) | 5.45<br>(2.80-10.62) |

Abbreviations: HR=hazard ratio, CI=confidence interval.

Model 1 unadjusted. Model 2 adjusted for birth year, sex and educational attainment. Model 3 additionally adjusted for Hypertension, Hyperlipidemia, COPD, Obesity, Diabetes mellitus, Myocardial infarction, Raynaud's phenomenon, Migraine, Cluster headache Horton syndrome, Myocarditis, Malignancy, Esophageal disease, Alcohol abuse, Cocaine abuse, Tobacco use. All calculations are based on double entry and 95% CI are calculated using robust standard errors.

**Table S4. Familial risk of vasospastic angina (VSA) defined by diagnosis of VSA and the occurrence of coronary angiography (AF037) during the same date in the national patient register (NPR).**

| Variable             | Person-years,<br>No. | Cases,<br>No./Persons at<br>risk, No. | Incidence rate,<br>cases/1000<br>person-years | Incidence rate ratio<br>(95%CI) | HR(95% CI)            |                      |                      |
|----------------------|----------------------|---------------------------------------|-----------------------------------------------|---------------------------------|-----------------------|----------------------|----------------------|
|                      |                      |                                       |                                               |                                 | <b>Model 1</b>        | <b>Model 2</b>       | <b>Model 3</b>       |
| Sibling not affected | 188036507            | 1286/10143204                         | 0.01<br>(0.01-0.01)                           | 1 [Reference]                   | 1 [Reference]         | 1 [Reference]        | 1 [Reference]        |
| Sibling affected     | 25280                | 2/1288                                | 0.08<br>(0.02-0.32)                           | 11.57<br>(2.89-46.30)           | 11.38<br>(1.64-78.89) | 6.06<br>(0.86-42.90) | 4.31<br>(0.62-30.15) |

Abbreviations: HR=hazard ratio, CI=confidence interval.

Model 1 unadjusted. Model 2 adjusted for birth year, sex and educational attainment. Model 3 additionally adjusted for Hypertension, Hyperlipidemia, COPD, Obesity, Diabetes mellitus, Myocardial infarction, Raynaud's phenomenon, Migraine, Cluster headache Horton syndrome, Myocarditis, Malignancy, Esophageal disease, Alcohol abuse, Cocaine abuse, Tobacco use. All calculations are based on double entry and 95% CI are calculated using robust standard errors.

**Table S5. Sibling risk of vasospastic angina (VSA) after exclusion of VSA cases undergoing myocardial revascularization according to Table S1 at the same date of diagnosis**

| Variable             | Person-years, No. | Cases, No./Persons at risk, No. | Incidence rate, cases/1000 person-years | Incidence rate ratio (95%CI) | HR(95% CI)           |                     |                     |
|----------------------|-------------------|---------------------------------|-----------------------------------------|------------------------------|----------------------|---------------------|---------------------|
|                      |                   |                                 |                                         |                              | <b>Model 1</b>       | <b>Model 2</b>      | <b>Model 3</b>      |
| Sibling not affected | 187905469         | 7424/10136266                   | 0.04<br>(0.04-0.04)                     | 1 [Reference]                | 1 [Reference]        | 1 [Reference]       | 1 [Reference]       |
| Sibling affected     | 145115            | 42/7466                         | 0.29<br>(0.21-0.39)                     | 7.33<br>(5.41-9.92)          | 7.37<br>(4.84-11.23) | 3.28<br>(2.15-5.01) | 2.52<br>(1.65-3.84) |

Abbreviations: HR=hazard ratio, CI=confidence interval.

Model 1 unadjusted. Model 2 adjusted for birth year, sex and educational attainment. Model 3 additionally adjusted for Hypertension, Hyperlipidemia, COPD, Obesity, Diabetes mellitus, Myocardial infarction, Raynaud's phenomenon, Migraine, Cluster headache Horton syndrome, Myocarditis, Malignancy, Esophageal disease, Alcohol abuse, Cocaine abuse, Tobacco use. All calculations are based on double entry and 95% CI are calculated using robust standard errors.

**Table S6. Sibling risk of vasospastic angina (VSA) stratified by age difference between siblings.**

| Age difference | Variable             | Person-years, No. | Cases, No./Persons at risk, No. | Incidence rate, cases/1000 person-years | Incidence rate ratio (95%CI) | HR(95% CI)           |                     |                     |
|----------------|----------------------|-------------------|---------------------------------|-----------------------------------------|------------------------------|----------------------|---------------------|---------------------|
|                |                      |                   |                                 |                                         |                              | <b>Model 1</b>       | <b>Model 2</b>      | <b>Model 3</b>      |
| < 6 years      | Sibling not affected | 129571172         | 4933/ 7111605                   | 0.04<br>(0.04-0.04)                     | 1 [Reference]                | 1 [Reference]        | 1 [Reference]       | 1 [Reference]       |
|                | Sibling affected     | 96110             | 32/4965                         | 0.33<br>(0.24-0.47)                     | 8.75<br>(6.18-12.38)         | 8.79<br>(5.40-14.29) | 3.36<br>(2.06-5.47) | 2.59<br>(1.59-4.21) |
| ≥ 6 years      | Sibling not affected | 58338141          | 2868/ 3025038                   | 0.05<br>(0.05-0.05)                     | 1 [Reference]                | 1 [Reference]        | 1 [Reference]       | 1 [Reference]       |
|                | Sibling affected     | 56364             | 16/2884                         | 0.28<br>(0.17-0.46)                     | 5.77<br>(3.53-9.44)          | 5.79<br>(2.92-11.50) | 3.42<br>(1.72-6.78) | 2.48<br>(1.26-4.90) |

Abbreviations: HR=hazard ratio, CI=confidence interval.

Model 1 unadjusted. Model 2 adjusted for birth year, sex and educational attainment. Model 3 additionally adjusted for Hypertension, Hyperlipidemia, COPD, Obesity, Diabetes mellitus, Myocardial infarction, Raynaud's phenomenon, Migraine, Cluster headache Horton syndrome, Myocarditis, Malignancy, Oesophageal disease, Alcohol abuse, Cocaine abuse, Tobacco use. All calculations are based on double entry and 95% CI are calculated using robust standard errors.

**Table S7. Familial risk of vasospastic angina (VSA) in spouses of affected individuals.**

| Variable            | Person-years,<br>No. | Cases,<br>No./Persons at<br>risk, No. | Incidence rate,<br>cases/1000<br>person-years | Incidence rate ratio<br>(95%CI) | HR(95% CI)          |                     |                     |
|---------------------|----------------------|---------------------------------------|-----------------------------------------------|---------------------------------|---------------------|---------------------|---------------------|
|                     |                      |                                       |                                               |                                 | <b>Model 1</b>      | <b>Model 2</b>      | <b>Model 3</b>      |
| Spouse not affected | 187933547            | 7841/ 10136643                        | 0.04<br>(0.04-0.04)                           | 1 [Reference]                   | 1 [Reference]       | 1 [Reference]       | 1 [Reference]       |
| Spouse affected     | 128240               | 8/ 6529                               | 0.06<br>(0.03-0.12)                           | 1.50<br>(0.75-2.99 )            | 1.51<br>(0.46-4.99) | 0.69<br>(0.21-2.30) | 0.63<br>(0.19-2.09) |

Abbreviations: HR=hazard ratio, CI=confidence interval.

Model 1 unadjusted. Model 2 adjusted for birth year, sex and educational attainment. Model 3 additionally adjusted for Hypertension, Hyperlipidemia, COPD, Obesity, Diabetes mellitus, Myocardial infarction, Raynaud's phenomenon, Migraine, Cluster headache Horton syndrome, Myocarditis, Malignancy, Oesophageal disease, Alcohol abuse, Cocaine abuse, Tobacco use. All calculations are based on double entry and 95% CI are calculated using robust standard errors.

**Table S8. Crude and multivariate Cox proportional hazard models.**

|                                  | Reference  | HR (95% CI)         |                  |                   |
|----------------------------------|------------|---------------------|------------------|-------------------|
|                                  |            | Model 1             | Model 2          | Model 3           |
| <b>Sibling affected</b>          | No         | 7.64 (5.17-11.31)   | 3.39 (2.28-5.03) | 2.56 (1.73-3.79)  |
| <b>Female Sex</b>                | Male       | 1.87 (1.72-2.03)    | 1.80 (1.66-1.96) | 2.41 (2.13-2.63)  |
| <b>Year of born</b>              |            | 0.93 (0.92-0.93)    | 0.93 (0.93-0.93) | 0.96 (0.95-0.96)  |
| <b>Education</b>                 |            |                     |                  |                   |
| 10-11 years                      | Unknown or | 0.51 (0.46-0.56)    | 1.04 (0.94-1.15) | 1.11 (1.01-1.23)  |
| >11 years                        | 1-9 years  | 0.29 (0.26-0.32)    | 0.85 (0.76-0.96) | 1.08 (0.96-1.21)  |
| <b>Comorbidity</b>               |            |                     |                  |                   |
| Hypertension                     | No         | 12.10 (11.11-13.17) |                  | 2.38 (2.09-2.71)  |
| Hyperlipidemia                   | No         | 16.39 (15.12-17.77) |                  | 3.52 (3.13-3.95)  |
| COPD                             | No         | 5.20 (4.57-5.91)    |                  | 1.09 (0.95-1.25)  |
| Obesity                          | No         | 2.89 (2.49-3.34)    |                  | 1.25 (1.08-1.46)  |
| Diabetes mellitus                | No         | 4.92 (4.47-5.43)    |                  | 0.93 (0.83-1.03)  |
| Myocardial infarction            | No         | 17.00 (15.59-18.55) |                  | 3.59 (3.20-4.02)  |
| Raynaud's phenomenon             | No         | 5.94 (3.44-10.24)   |                  | 3.10 (1.78-5.40)  |
| Migraine                         | No         | 2.41 (2.02-2.87)    |                  | 2.29 (1.91-2.73)  |
| Cluster headache Horton syndrome | No         | 1.69 (0.64-4.44)    |                  | 1.08 (0.41-2.87)  |
| Myocarditis                      | No         | 5.38 (3.46-8.39)    |                  | 3.16 (2.05-4.87)  |
| Malignancy                       | No         | 2.98 (2.72-3.26)    |                  | 1.04 (0.94-1.14)  |
| Esophageal disease               | No         | 4.98 (4.47-5.56)    |                  | 2.02 (1.81-2.27)  |
| Alcohol abuse                    | No         | 1.50 (1.26-1.80)    |                  | 1.27 (1.06-1.53)  |
| Cocaine abuse                    | No         | 1.60 (0.32-7.97)    |                  | 2.09 (0.42-10.42) |
| Tobacco use                      | No         | 4.74 (4.13-5.45)    |                  | 1.32 (1.14-1.54)  |

Abbreviations: HR=hazard ratio, CI=confidence interval. Model 1 crude. Model 2 Prinzmetal adjusted for birth year, sex and educational attainment. Model 3 additionally adjusted for Hypertension, Hyperlipidemia, COPD, Obesity, Diabetes mellitus, Myocardial infarction, Raynaud's phenomenon, Migraine, Cluster headache Horton syndrome, Myocarditis, Malignancy, Esophageal disease, Alcohol abuse, Cocaine abuse, Tobacco use. All calculations are based on double entry and 95% CI are calculated using robust standard errors.
