# Supplementary material for: Familial risk of vasospastic angina: a nationwide family study in Sweden
Source: PubMed Central journal article supplement (PMC10711886; doi:10.1136/openhrt-2023-002504), 2023-12-06

# Familial Risk of Vasospastic Angina: a Nationwide Family Study in Sweden

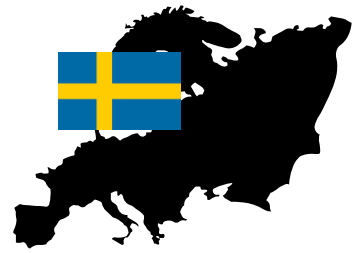

Sweden

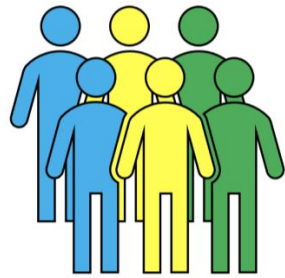

N=5,764,770

Full-siblings cohort

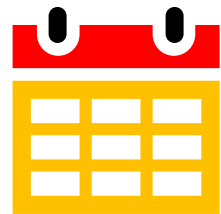

1932 - 2018

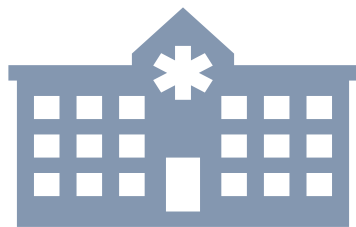

Multi-Generation & National Patient Registers

## Incident Rate of Vasospastic Angina

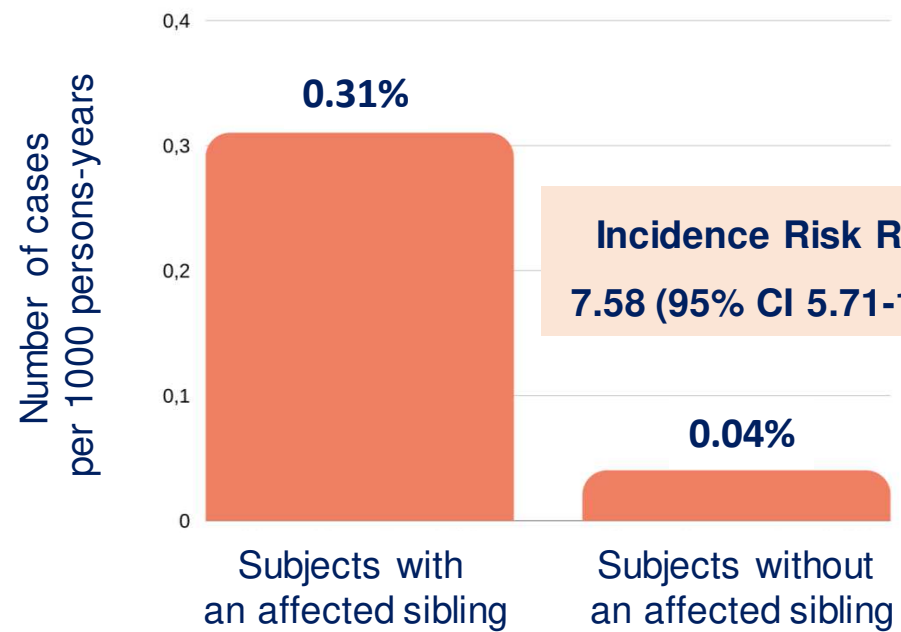

## Risk of vasospastic angina in subjects with an affected sibling compared with siblings without an affected sibling

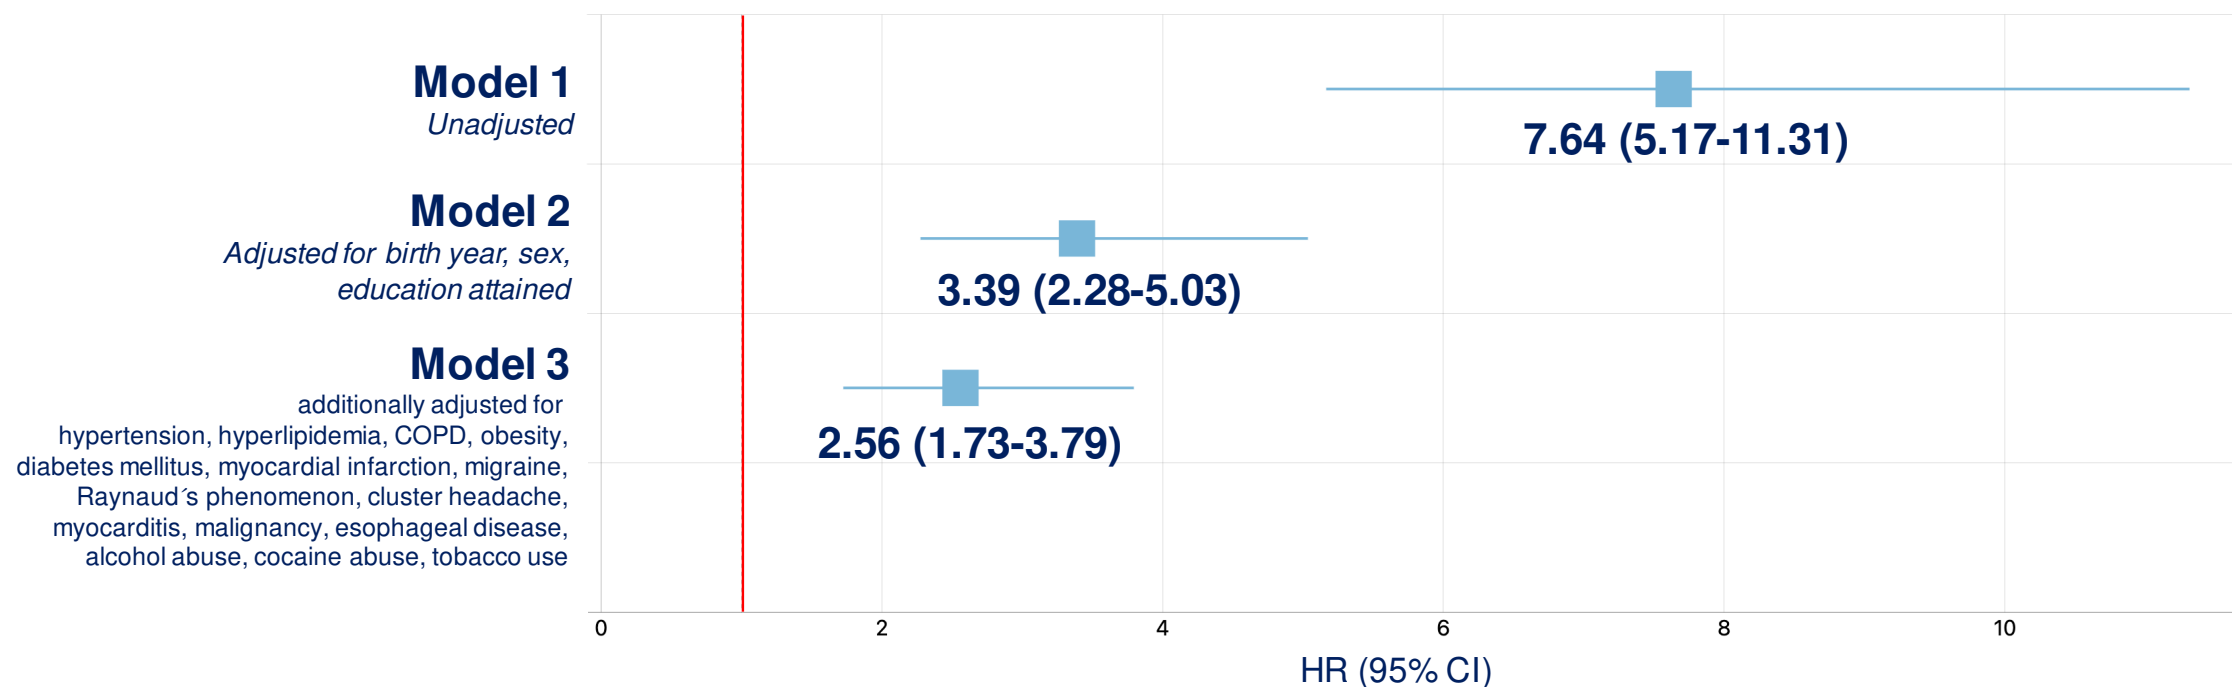

Supplement: openhrt-2023-002504supp002.pdf [file openhrt-2023-002504supp002.pdf]
